1 Running title: Mechanisms of top-down modulation in human visual cortex

2

3 Flexible top-down modulation in  
4 human ventral temporal cortex

5

6 Ruyuan Zhang, Kendrick Kay

7

8 Center for Magnetic Resonance Research, Department of Radiology

9 University of Minnesota, Minneapolis, MN 55455

10

11

12

13 Correspondence:

14 Kendrick Kay

15 Center for Magnetic Resonance Research

16 University of Minnesota

17 2021 6th Street SE

18 Minneapolis, MN 55455

19 510-206-1059

20 [kay@umn.edu](mailto:kay@umn.edu)

21

22 Keywords:

23 Attention, Human ventral temporal cortex, Fusiform face area, Bottom-up processing, Top-down  
24 processing

25

26

1 **ABSTRACT**

2 Visual neuroscientists have long characterized attention as inducing a scaling or additive effect  
3 on fixed parametric functions describing neural responses (e.g., contrast response functions).  
4 Here, we instead propose that top-down effects are more complex and manifest in ways that  
5 depend not only on attention but also other cognitive processes involved in executing a task. To  
6 substantiate this theory, we analyze fMRI responses in human ventral temporal cortex (VTC) in  
7 a study where stimulus eccentricity and cognitive task are varied. We find that as stimuli are  
8 presented farther into the periphery, bottom-up stimulus-driven responses decline but top-down  
9 attentional enhancement increases substantially. This disproportionate enhancement of weak  
10 responses cannot be easily explained by conventional models of attention. Furthermore, we find  
11 that attentional effects depend on the specific cognitive task performed by the subject, indicating  
12 the influence of additional cognitive processes other than attention (e.g., decision-making). The  
13 effects we observe replicate in an independent experiment from the same study, and also  
14 generalize to a separate study involving different stimulus manipulations (contrast and phase  
15 coherence). Our results suggest that a quantitative understanding of top-down modulation  
16 requires more nuanced and more precise characterization of multiple cognitive factors involved  
17 in completing a perceptual task.

18

19

20

21

22

## 1 INTRODUCTION

2 To tackle the immense size and complexity of visual inputs, the brain concentrates limited  
3 attentional resources on the most informative aspects of visual inputs. The mechanisms of  
4 attentional allocation have been an active research area in past years, because of the pivotal role  
5 that attention plays in different sensory processes, such as feature binding ([Treisman AM and G](#)  
6 [Gelade 1980](#)), object recognition ([Walther D et al. 2002](#)), and scene understanding ([Itti L et al.](#)  
7 [1998](#)). Neuroscientists are particularly interested in the neural substrates of attention. Converging  
8 evidence from primate electrophysiology and human neuroimaging suggests that attention  
9 induces enhancement in microscopic neuronal activity ([Reynolds JH et al. 2000](#)) as well as  
10 macroscopic cortical responses ([Gandhi SP et al. 1999](#); [Murray SO and E Wojciulik 2004](#)). Such  
11 attention-induced response enhancement is thought to produce more robust sensory  
12 representations ([Kastner S and LG Ungerleider 2000](#); [Reynolds JH and L Chelazzi 2004](#)).

13 Despite the well-established finding of attentional enhancement of neural responses, the  
14 precise quantitative nature of attentional enhancement remains unclear. One conventional  
15 approach to tackling this issue is to characterize the impact of attention on the shape of contrast  
16 response functions (CRFs) ([Reynolds JH et al. 2000](#); [Buracas GT and GM Boynton 2007](#);  
17 [Boynton GM 2009](#)), that is, functions describing the relationship between input stimulus contrast  
18 and output neural response. Under the assumption that neural responses follow a fixed  
19 parametric form (such as the commonly used Naka-Rushton function ([Albrecht DG and DB](#)  
20 [Hamilton 1982](#))), attention is characterized as imposing a scaling or additive effect on either  
21 input contrast or output response. As illustrated in Figure 1, attention could have the effect of  
22 amplifying the overall CRF (Figure 1A), enhancing the input contrast (Figure 1B), or inducing a  
23 baseline shift (Figure 1C). Though mathematically elegant, this approach cannot fully explain  
24 some experimental measurements found in the attention literature ([Luck SJ et al. 1997](#); [Reynolds](#)  
25 [JH et al. 2000](#); [Li X et al. 2008](#); [Murray SO 2008](#)), and moreover, it is not clear whether this  
26 *fixed-parameter approach* generalizes to stimulus dimensions other than contrast. Thus, it  
27 remains an open question whether the approach provides a satisfactory account of attentional  
28 effects.

29 In this paper, we advocate moving beyond the fixed-parameter approach and argue that it  
30 is more appropriate to consider attention as a flexible process that depends on the specific stimuli  
31 and task demands faced by the observer. In this *flexible-attention framework*, attention is not a

1 simple binary variable (i.e., ‘present’, ‘absent’), but rather, attentional effects depend on specific  
2 properties of the cognitive processes involved in a task (e.g., whether a detection or a  
3 discrimination task is being performed). Since tasks are remarkably diverse, the effects of  
4 attention on neural responses may manifest in different ways, and a fixed parametric function  
5 might not accurately capture attentional effects observed in an arbitrary experiment. Empirical  
6 evidence inspiring the flexible-attention framework comes from a recent study ([Kay KN and JD](#)  
7 [Yeatman 2017](#)) in which we measured cortical responses to different stimulus categories while  
8 subjects performed different tasks (henceforth referred to as the *category study*).

9 Here, we strengthen support for the flexible-attention framework through a re-  
10 examination of experimental measurements from an independent study ([Kay KN et al. 2015](#)). In  
11 this study, cortical responses were measured for different stimulus positions while subjects  
12 performed different tasks (henceforth referred to as the *position study*). We quantify attentional  
13 effects in human ventral temporal cortex (VTC) as a function of stimulus eccentricity, and apply  
14 the same type of analysis to the category study, thereby allowing direct comparison of results.  
15 Across studies, we show that weak stimulus-driven responses receive disproportionately large  
16 attentional enhancements and attentional enhancements are more pronounced for certain tasks  
17 compared to others. Such effects are not well explained by conventional models of attention, and  
18 therefore suggest the need to develop a more flexible framework for attention. In the Discussion,  
19 we propose specific ways in which the concept of “flexible attention” might be formalized into a  
20 quantitative model.

21

22

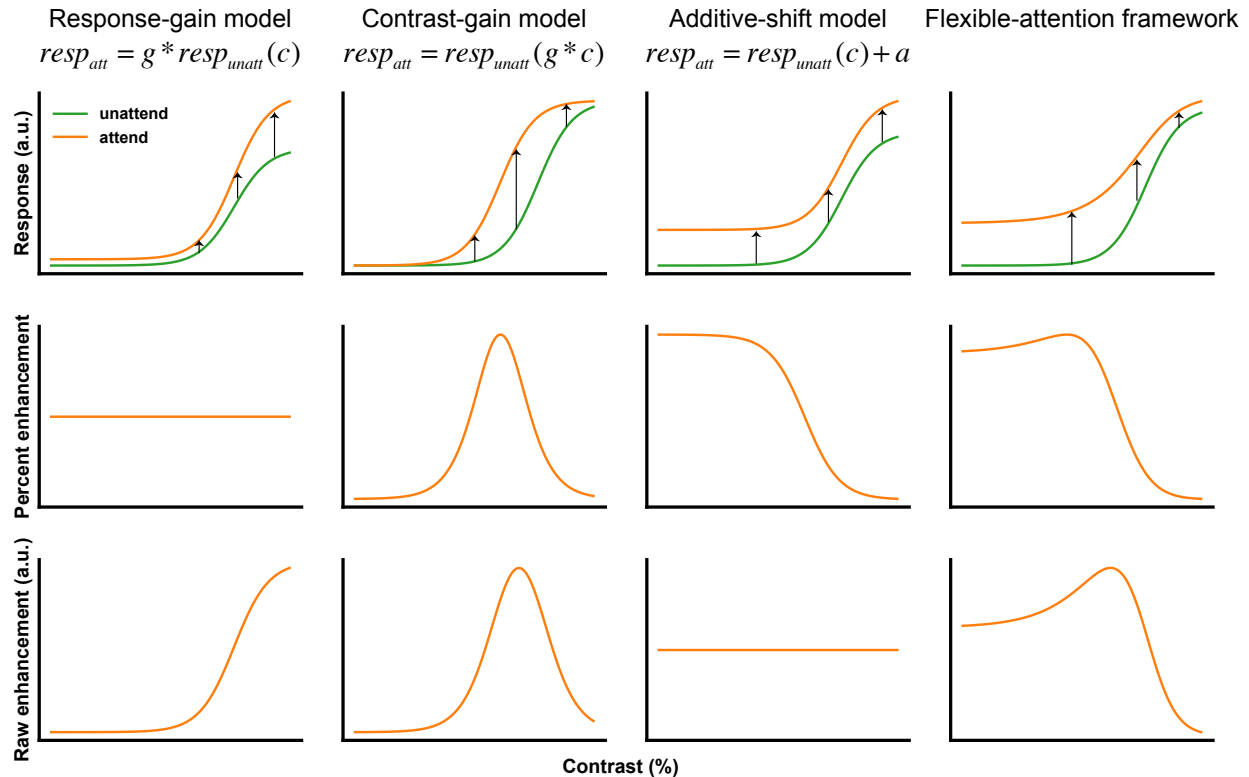

1  
2  
3  
4  
5  
6  
7  
8  
9  
10  
11  
12  
13  
14  
15  
16  
17  
18

Figure 1. Schematics of conventional models of attention and the flexible-attention framework. The first row depicts contrast response functions under unattended ( $resp_{unatt}$ ) and attended ( $resp_{att}$ ) conditions. Arrows indicate attentional enhancement. The second and third rows depict the amount of attentional enhancement under two different metrics: percent enhancement (Equation 1) and the raw enhancement (Equation 2), respectively. The *response-gain model* posits that attention imposes a scaling effect ( $g$ ) on the output, and therefore predicts that percent enhancement is a flat function of contrast. The *contrast-gain model* posits that attention imposes a scaling effect ( $g$ ) on the input contrast, and predicts that both percent enhancement and raw enhancement are inverted U-shaped functions. The *additive-shift model* posits that attention imposes an additive effect ( $a$ ) on the output, and predicts that raw enhancement is a flat function of contrast. In contrast to these fixed-parameter approaches, the *flexible-attention framework* allows for the possibility that attentional effects are neither constant in percent enhancement nor constant in raw enhancement. Here we depict one possibility where attention disproportionately enhances low-contrast responses.

## 19 MATERIALS AND METHODS

20 *Experiment and MRI data acquisition.* Three adults participated in the position study ([Kay KN et](#)  
21 [al. \(2015\)](#)). In the *task experiment* (Figure 2), face stimuli (3.2° diameter) appeared at different  
22 positions of a 5 x 5 spatial grid (1.5° spacing). This grid sampled six distinct eccentricities (0°,  
23 1.5°, 2.1°, 3°, 3.4° and 4.2°). Each trial consisted of 7 sequentially presented faces (500ms/face) at

1 a single position but with various identities and viewpoints. Some trials involved two  
2 consecutive faces sharing the same identity but different viewpoints, and some trials involved a  
3 red dot appearing at the center of the faces (coincident with one of the 7 faces). A stream of  
4 digits ( $0.3^\circ \times 0.3^\circ$ ) was placed at the center-of-gaze. In a given run, participants were instructed  
5 to perform either (1) a digit task, during which participants pressed a button whenever the same  
6 digit repeated; (2) a dot task, during which participants pressed a button whenever a red dot  
7 appeared; or (3) a face task, during which participants pressed a button whenever the same face  
8 identity repeated within a trial. Participants fixated the central stream of digits during all three  
9 tasks (verified using an eyetracker). There were 75 experimental conditions (25 locations x 3  
10 tasks) and 8 trials for each condition over the course of the experiment. All experimental details  
11 are described in [Kay KN et al. \(2015\)](#).

12 The position study included another experiment, called the *interleaved-task experiment*.  
13 This experiment was the same as the task experiment (Figure 2) except that the three tasks were  
14 randomly intermixed in a trial-by-trial fashion within each run. A central red letter ( $0.3^\circ \times 0.3^\circ$ )  
15 presented at the beginning of each trial served as a cue for which task to perform. This  
16 experiment provides an additional, independent set of data.

17

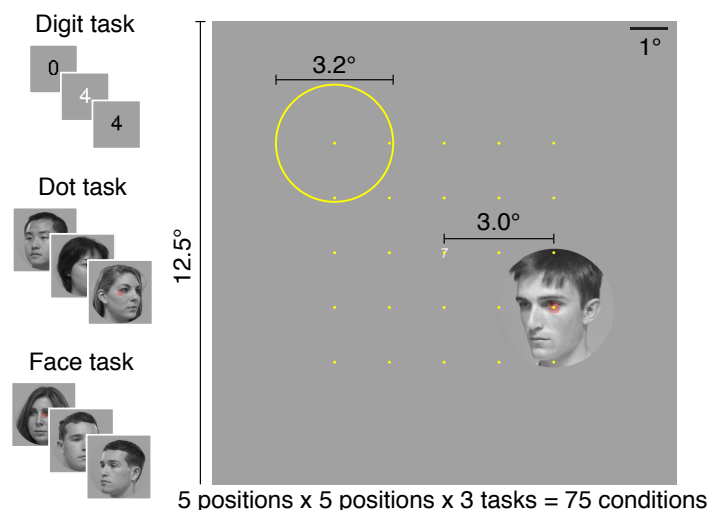

19

20 Figure 2. Stimuli and tasks from the position study ([Kay KN et al. \(2015\)](#)). In a  
21 given trial, a sequence of face stimuli (7 face images) appears in one of twenty-  
22 five positions. The *digit task* is a one-back task on the stream of digits at the  
23 center-of-gaze. The *dot task* is to detect the occurrence of a red dot on the faces.  
24 The *face task* is a one-back task on the identity of the faces. Subjects maintained  
central fixation, and stimuli were identical across the three tasks.



1 
$$\text{Raw enhancement} = R_{\text{dot/face}} - R_{\text{digit}} \quad (2)$$

2 where  $R_{\text{dot/face}}$  indicates an ROI's response for a stimulus location in the dot or the face task and  
3  $R_{\text{digit}}$  indicates the ROI's response for the same location in the digit task. This calculation  
4 provides 50 values (25 for the dot task and 25 for the face task) for each metric.

5  
6 *Analysis of data from the category study.* We reanalyzed data from the category study ([Kay KN](#)  
7 [and JD Yeatman 2017](#)) using the same methods described above for the position study. In brief,  
8 the category study involved presentation of words, faces, and other stimulus categories varying  
9 in contrast and phase coherence. Subjects performed one of three tasks: (1) a fixation task,  
10 during which participants pressed a button whenever the fixation dot turned red; (2) a  
11 categorization task, during which participants reported whether the stimulus was a word, face, or  
12 neither; and (3) a one-back task, during which participants pressed a button whenever an image  
13 was repeated twice in a row.

14 In Figures 6–8, we directly compare results across the position and category studies. To  
15 facilitate comparison, we pooled voxels from pFus and mFus in the position study to match the  
16 definition of fusiform face area (FFA) in the category study. Also, since overall response  
17 amplitudes might vary for incidental reasons across subjects, we normalized bottom-up  
18 responses (responses during the digit task of the position study and responses during the fixation  
19 task of the category study) by dividing by the maximal response amplitude observed in each  
20 study and ROI. For example, the full set of responses measured from FFA in the category study  
21 (including both contrast and phase coherence conditions) was divided by the maximum response.  
22 Note that this normalization affects raw enhancement values but not percent enhancement  
23 values.

24  
25 *Error bars.* Unless otherwise indicated, error bars indicate 68% confidence intervals, obtained by  
26 bootstrapping across locations that share the same eccentricity (position study) or bootstrapping  
27 across subjects (category study).

## 28 **RESULTS**

29 *Cortical responses as a function of stimulus eccentricity and behavioral task*



1 We refer to the main experiment in the position study as the *task experiment* (see Methods for  
2 details). In the task experiment, participants performed three different cognitive tasks on face  
3 stimuli that appeared at six different eccentricities while blood oxygenation level dependent  
4 (BOLD) signals in human ventral temporal cortex (VTC) were measured. Using face stimuli  
5 rather than artificial visual stimuli (e.g., checkerboards) produces strong responses not only in  
6 early visual areas but also in high-level category-selective regions. This allows us to assess  
7 attentional effects throughout the visual cortical hierarchy.

8 Participants performed three different tasks. The *digit task* is a one-back task on a stream  
9 of digits placed at the center-of-gaze. Face stimuli in this task are irrelevant to the participants,  
10 and the purpose of this task is to maintain participants' attention at the central fixation point.  
11 Although participants may occasionally attend to the face stimuli, we interpret responses in the  
12 digit task as primarily reflecting bottom-up visual processing with minimal top-down influences.  
13 The *dot task* requires participants to detect the occasional appearance of a red dot superimposed  
14 on the face stimuli. In this task, face features (e.g., identity, viewpoint) are irrelevant to the  
15 participants. The *face task* requires participants to perform a one-back task on face identity; thus,  
16 face features in this task are highly relevant to the participants.

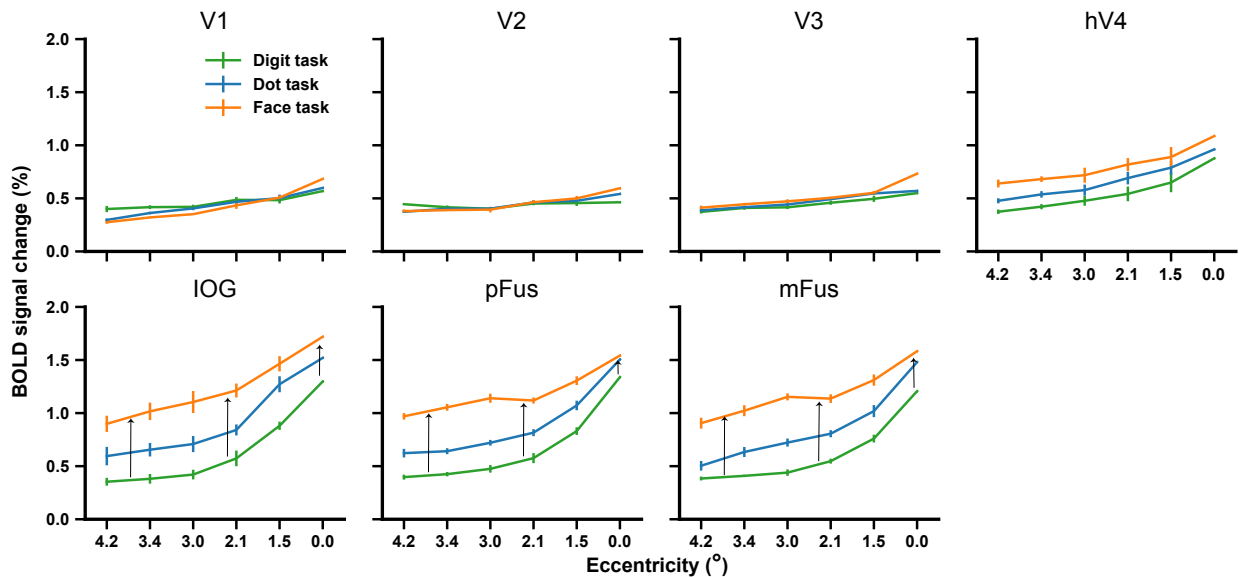

17  
18 Figure 3. Percent BOLD signal change as a function of stimulus eccentricity and  
19 task. The order of stimulus eccentricity is reversed to make eccentricity-response  
20 functions visually comparable to contrast-response functions. BOLD responses  
21 are pooled across subjects and hemispheres (see Methods). Error bars indicate  
22 68% confidence intervals on the bootstrapped mean of responses across locations  
23 at the same eccentricity (note that 0° corresponds to only one location and thus

1 has no error estimate). Unless specifically mentioned, the same error-bar  
2 convention is used in subsequent figures. Responses in high-level visual areas  
3 exhibit substantial dependence on both eccentricity and task. Black arrows  
4 highlight the disproportionate attentional enhancement at high eccentricities,  
5 reminiscent of the schematic of the flexible-attention framework in Figure 1.  
6

7 We summarized the responses of each region-of-interest (ROI) as a function of stimulus  
8 eccentricity, producing eccentricity-response functions (ERFs). This is analogous to  
9 conventional contrast-response functions where responses are plotted as a function of stimulus  
10 contrast. Examining the ERFs allows us to inspect whether attentional effects observed for  
11 contrast response functions generalize to other feature dimensions. We discovered several  
12 prominent effects. First, the evoked responses in high-level face-selective areas generally  
13 decrease as stimulus eccentricity increases (Figure 3), indicating that stimulus eccentricity, like  
14 contrast, has a strong influence on cortical responses. Second, the fact that responses increase  
15 from the dot task to the face task suggests that the brain enhances responses if the task requires  
16 detailed processing of the attended stimulus. Finally, the effect of task on cortical responses  
17 progressively developed along the visual cortical hierarchy, suggesting that attentional effects are  
18 more pronounced in brain regions whose representations are critical to successful execution of  
19 the task (i.e., face-selective regions for judging face identity).

#### 20 *Conventional models of attention cannot fully account for observed attentional effects*

21 We next evaluate the accuracy of different attentional models. We quantified attentional effects  
22 as a function of stimulus eccentricity and task using two metrics: *percent enhancement* (Equation  
23 1) and *raw enhancement* (Equation 2). These metrics were used because they allow direct  
24 assessment of the accuracy of the response-gain and the additive-shift models of attention  
25 (Figure 1). Results indicate that previously proposed models of attention do not fully account for  
26 the data (Figure 4). The reasons are as follows.

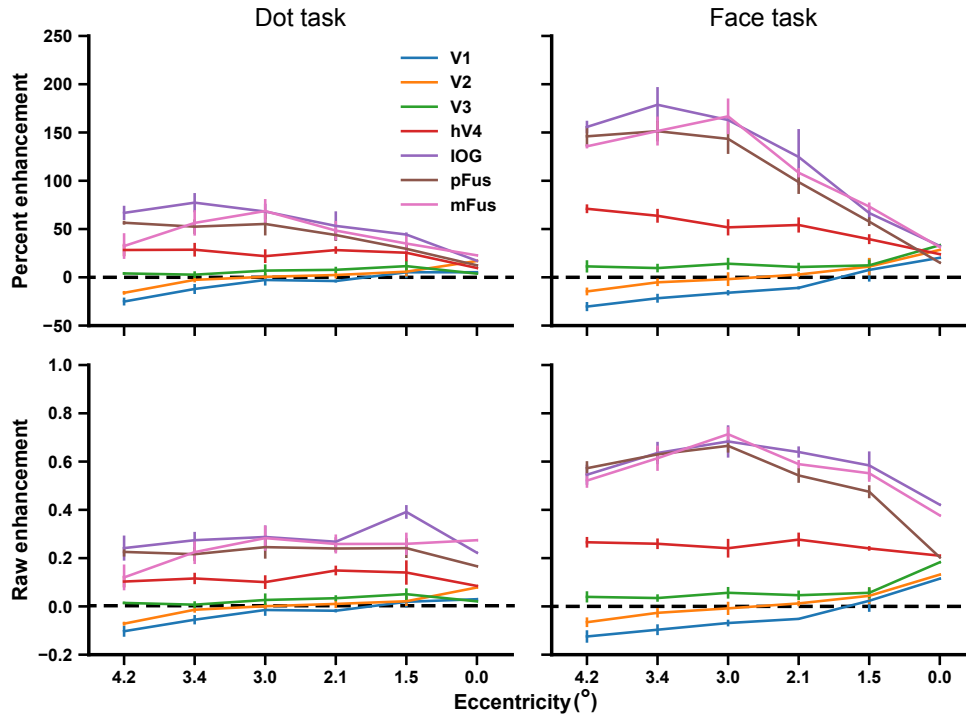

1  
2 Figure 4. Attentional enhancement as a function of stimulus eccentricity and task.  
3 BOLD responses during the stimulus-relevant tasks (dot and face tasks)  
4 are expressed as percent enhancement (upper row) and raw enhancement (bottom row)  
5 relative to the responses during the digit task. The horizontal dashed line indicates  
6 no attentional enhancement. The magnitude of the attentional effect increases from  
7 fovea to periphery, from the dot task to the face task, and from low-level to high-  
8 level visual areas. This pattern is inconsistent with the three conventional models  
9 of attention (see explanations in main text). Note that the data point at 0°  
10 corresponds to only one location and thus has no error estimate.

11  
12 First, the response-gain model posits that attention amplifies the overall magnitude of  
13 ERFs, leading to larger attentional effects when bottom-up stimulus-driven responses are larger,  
14 i.e., in the fovea. It also predicts percent enhancement will be a flat line as a function of stimulus  
15 eccentricity. These predictions are not consistent with Figure 4—in the face-selective regions, raw  
16 enhancement is not large in the fovea and there is a clear rising trend of percent enhancement  
17 from fovea to periphery.

18 Second, the additive-shift model posits that attention vertically shifts ERFs; thus, raw  
19 enhancement should be a flat function of stimulus eccentricity. This prediction seems only  
20 consistent with the data in the dot task. The dot task, however, involved no demands for  
21 processing face features and the ROIs exhibiting the largest attentional effects are face-selective

1 regions (also see Discussion). In the face task, raw enhancement as a function of eccentricity is  
2 not a flat line and instead rises in face-selective regions as stimulus eccentricity increases.

3 Finally, the contrast-gain model predicts the largest percent enhancement and raw  
4 enhancement in middle levels of eccentricity, resulting in inverted U-shaped functions of percent  
5 enhancement and raw enhancement (Figure 1B). It is also unsuited here since the strongest  
6 attentional effects, under both metrics, appear in the far visual periphery (also see Discussion).

7 Since the results are inconsistent with attentional models proposed in previous literature,  
8 we propose the idea of flexible attention in which attentional effects do not necessarily conform  
9 to simple parametric changes. Before elaborating on this idea, we show first that the observed  
10 effects are not idiosyncratic features of this particular experiment but generalize across several  
11 stimulus and task manipulations.

### 12 *Reproducible effect of flexible attention on an independent dataset*

13 All analyses thus far are based on the data from the task experiment where three different  
14 cognitive tasks were performed in different scanning runs. We also conducted an *interleaved-*  
15 *task* experiment in which tasks were interleaved in a trial-by-trial fashion within a run (see  
16 Methods for details). This experiment provides an independent dataset that can be used to  
17 confirm the observed effects. We applied the same analysis above on the data from the  
18 interleaved-task experiment. The two independent experiments yield highly consistent results  
19 (Figure 5), further supporting the presence of flexible attentional modulation.

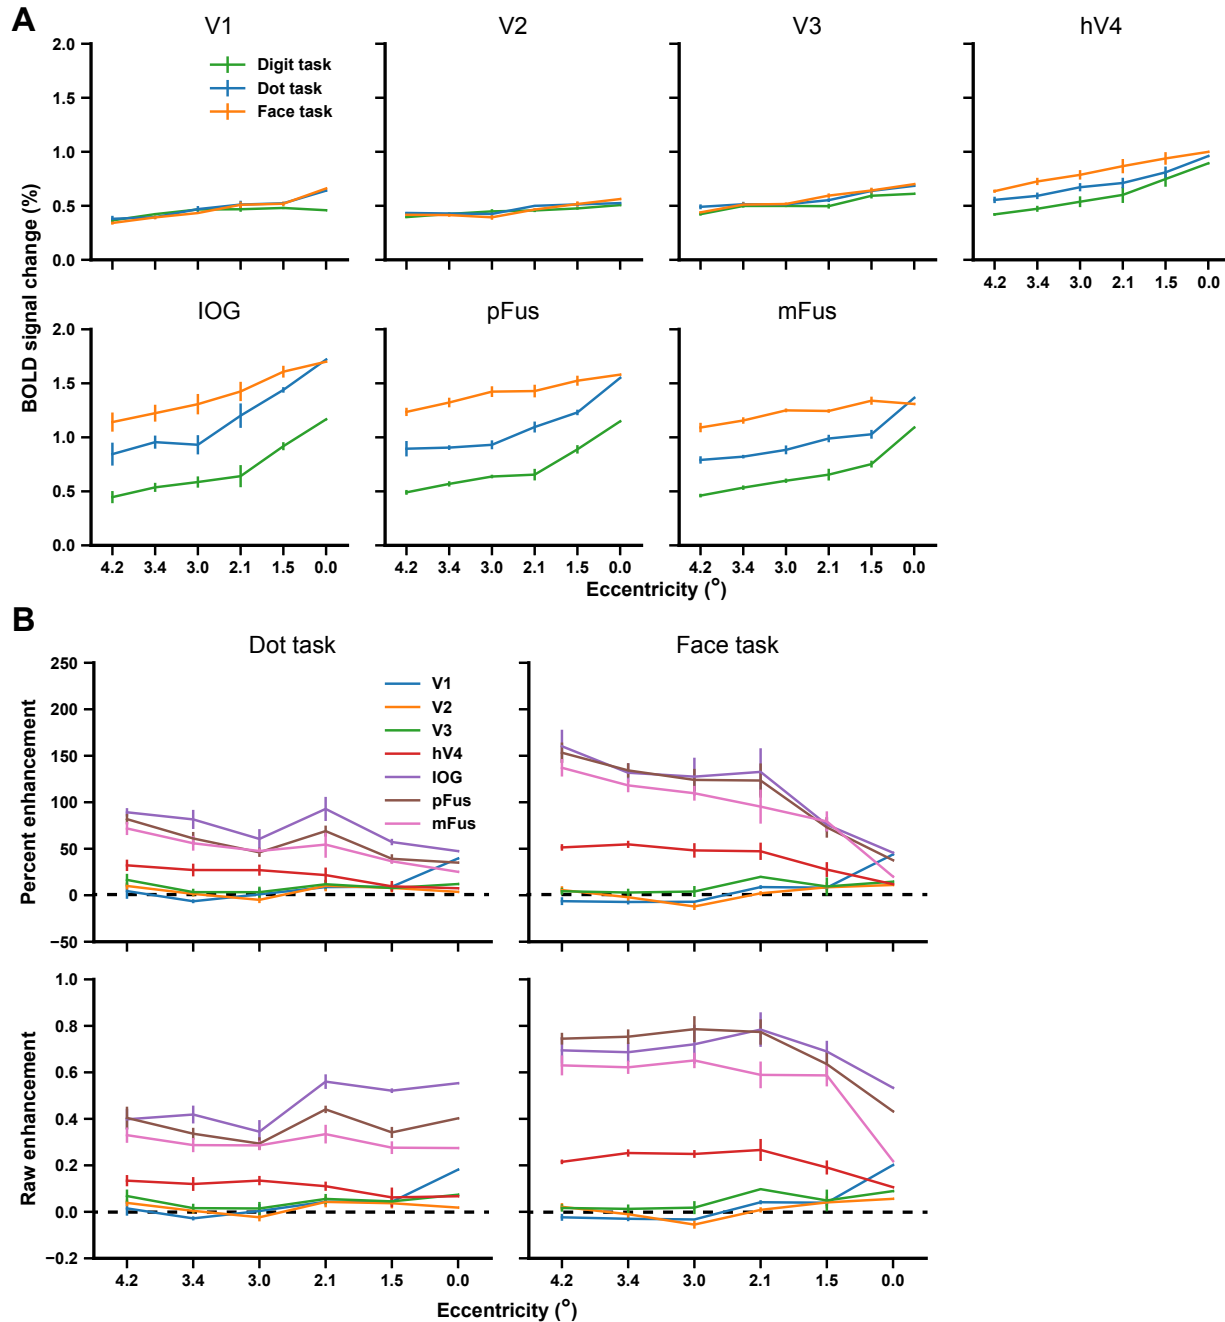

1  
2  
3  
4  
5  
6

Figure 5. Disproportionate attentional enhancements at high eccentricities in the interleaved-task experiment. **A-B**. Results are plotted in the same format as the results from the task experiment shown in Figures 3-4. Overall, the results from the two independent experiments are highly consistent.

7 *Evidence for flexible attention in other experimental manipulations*

8 The form of attentional modulation discovered in this study, especially the dependency of  
9 attentional effects on the level of physical stimulus, has rarely been discussed in previous

1 literature. However, we found similar effects in [Kay KN and JD Yeatman \(2017\)](#) (termed the  
 2 *category study*) in which responses to different stimulus categories are investigated. In that  
 3 study, we reported that attention selectively imposes larger scaling effects on weaker responses,  
 4 a phenomenon termed “stimulus-specific scaling”. We thus consider applying the same analyses  
 5 demonstrated above to the data from the category study. Exploiting the data from that study has  
 6 two major attractions: (1) In the position study, only one stimulus feature—eccentricity—is  
 7 manipulated. In the category study, stimuli are manipulated in both contrast and phase  
 8 coherence, thus providing two extra feature dimensions that influence bottom-up visual  
 9 processing. (2) The responses in another ROI—visual word form area (VWFA)—were also  
 10 measured. This allows us to test whether our findings are specific to FFA or generalize to other  
 11 high-level visual regions.

12 We extracted BOLD responses in FFA and VWFA toward their preferred stimulus  
 13 categories—faces and words, respectively. To make data from the two studies more comparable,  
 14 voxels from pFus and mFus in the position study were pooled, consistent with the definition of  
 15 FFA in the category study. Furthermore, we highlight data from the stimulus-relevant tasks that  
 16 yielded strongest attentional effects: the face task in the position study and the one-back task in  
 17 the category study.

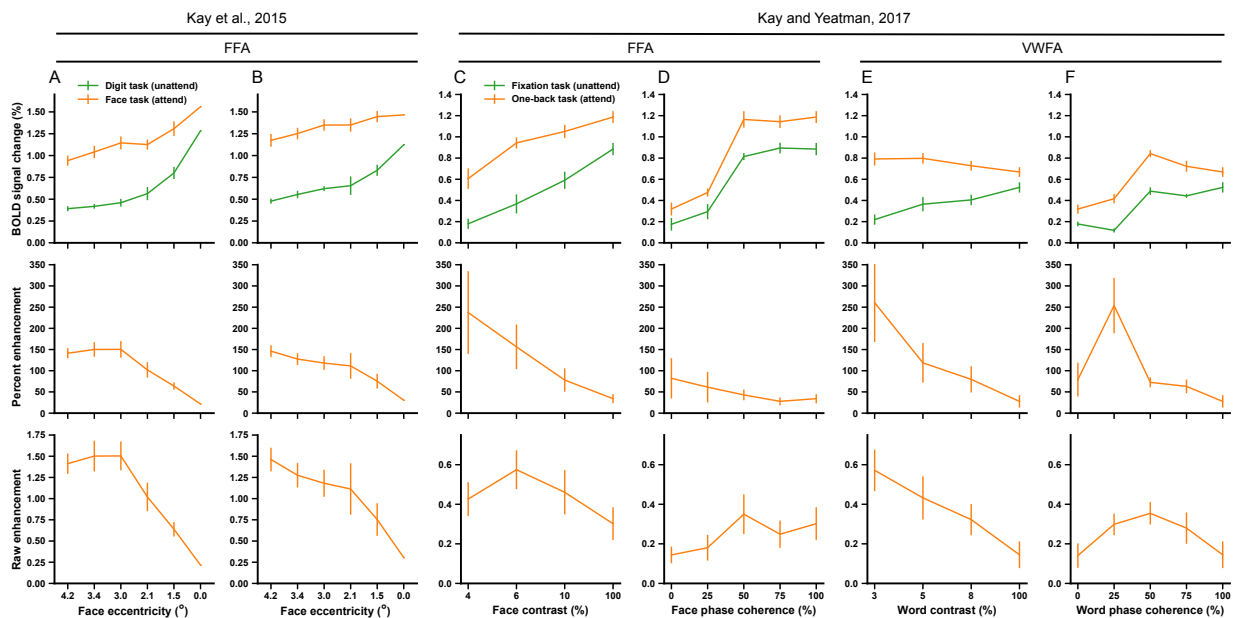

18  
 19 Figure 6. Disproportionate attentional enhancements generalize across  
 20 experiments. Panels A–B show results from the position study for the task and the  
 21 interleaved-task experiments, respectively. Panels C–F show results from the

1 category study. Data from that study have been analyzed in the same way as  
2 Panels A–B, except that error bars reflect 68% confidence intervals on the mean  
3 across subjects (see Methods for details). Across metrics, the amount of  
4 attentional enhancement generally decreases as stimulus strength (eccentricity,  
5 contrast, phase coherence) increases. Enhancement tends to be greatest when  
6 stimulus strength is low and bottom-up responses (green curves in the first row)  
7 are weak.

8  
9 The two studies show a consistent pattern (Figure 6): attentional effects are larger for  
10 stimuli that evoke weak bottom-up responses (digit task in the position study and fixation task in  
11 the category study). As explained previously, neither the response-gain nor the additive-shift  
12 model of attention can account for the results. Instead, these results suggest the need for the  
13 flexible-attention framework (Figure 1D). One exception to the general pattern of large  
14 attentional enhancement at weak stimulus strength lies in phase coherence (Figure 6D, F). We  
15 speculate that this may be due to the fact that 0% phase coherence images contain pure noise on  
16 which it may be easier to perform a one-back decision (also see Discussion).

17 To gain further insight into the relationship between bottom-up responses and the  
18 magnitude of attentional enhancement, we plot percent enhancement and raw enhancement  
19 values against the bottom-up responses across stimuli, tasks, studies, and ROIs (Figure 7). The  
20 clear inverse relationships between bottom-up responses and the amount of attentional effect  
21 indicate that attention disproportionately enhances weak neural responses.

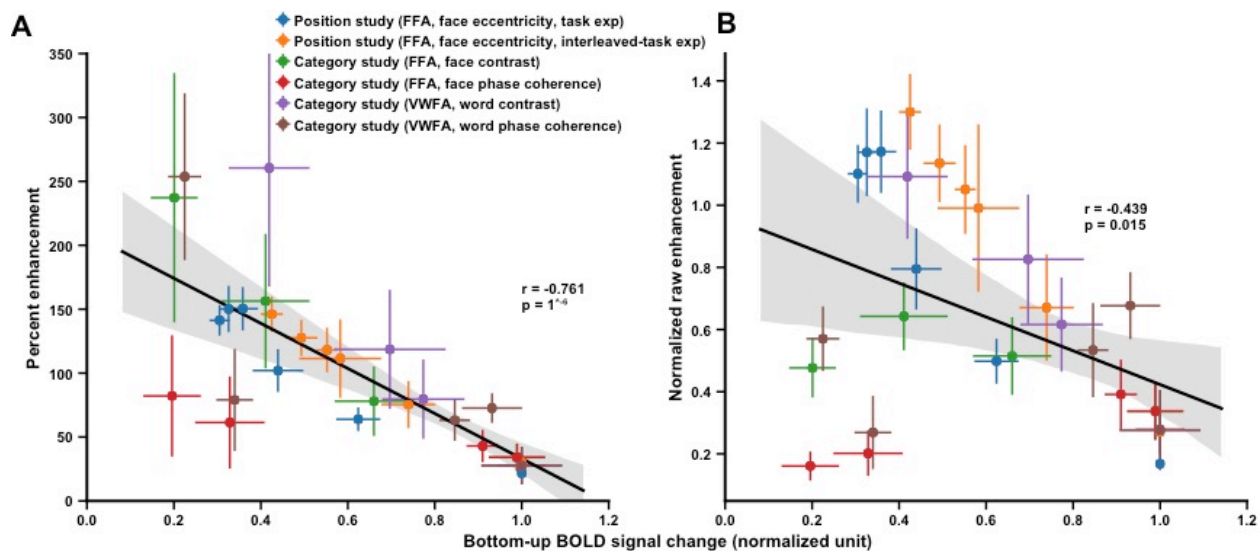

22

23 Figure 7. Inverse relationships between normalized bottom-up responses to  
24 percent enhancement (A), and normalized raw enhancement (B). All data points  
25 from the two studies depicted in Figure 6 are plotted. To ensure that BOLD

1 responses from different ROIs and experiments are in comparable units, we  
2 normalize the full set of responses observed during the bottom-up tasks (the digit  
3 task in the position study and the fixation task in the category study) in each ROI  
4 to a maximum of 1 (see Methods). The shaded area indicates the 95% confidence  
5 interval of a bootstrapped best-fit line. The results demonstrate that attentional  
6 enhancement tends to be greatest for stimuli that elicit weak bottom-up responses.  
7

### 8 *Larger responses in IPS in high-demand tasks compared to low-demand tasks*

9 Why does the brain disproportionately enhance responses to some stimuli and under some tasks  
10 compared to other experimental conditions? We suggest that this flexibility in attentional  
11 enhancement reflects the interaction between attention and the process of evidence accumulation  
12 to accomplish a perceptual decision. In this sense, attention is just one component of a perceptual  
13 task and we must consider other top-down processes, such as decision-making, when interpreting  
14 top-down modulation of neural responses. Stimuli with certain properties (e.g., low contrast, low  
15 phase-coherence) may yield weak or noisy sensory signals, and may therefore require extra  
16 decision time to complete the evidence accumulation process. We have identified IPS as a  
17 potential region that forms perceptual decisions, and this was evidenced by the fact that an  
18 evidence-accumulation model can link behavioral reaction times and IPS activity ([Kay KN and](#)  
19 [JD Yeatman 2017](#)).

20 Following this approach, we compared IPS responses across the various stimulus  
21 manipulations and tasks. IPS exhibited greater activity in the face task compared with the dot  
22 task in the position study (Figure 8A-B). This is in line with the more pronounced attentional  
23 effects observed in VTC for the face task. The result also mirrors the finding of greater IPS  
24 activity in the one-back task compared to the categorization task in the category study (Figure  
25 8C-D). The flexible-attention framework also suggests that IPS activity may show systematic  
26 variation as a function of stimuli within a given task. Indeed, the correlations between IPS  
27 activity to the contrast and phase-coherence levels were established in ([Kay KN and JD Yeatman](#)  
28 [2017](#)). However, in the position study, we did not find systematic correlation between IPS  
29 activity and attentional effects as function of eccentricity, possibly due to the limited slice  
30 coverage and suboptimal experimental design (see Discussion).

31



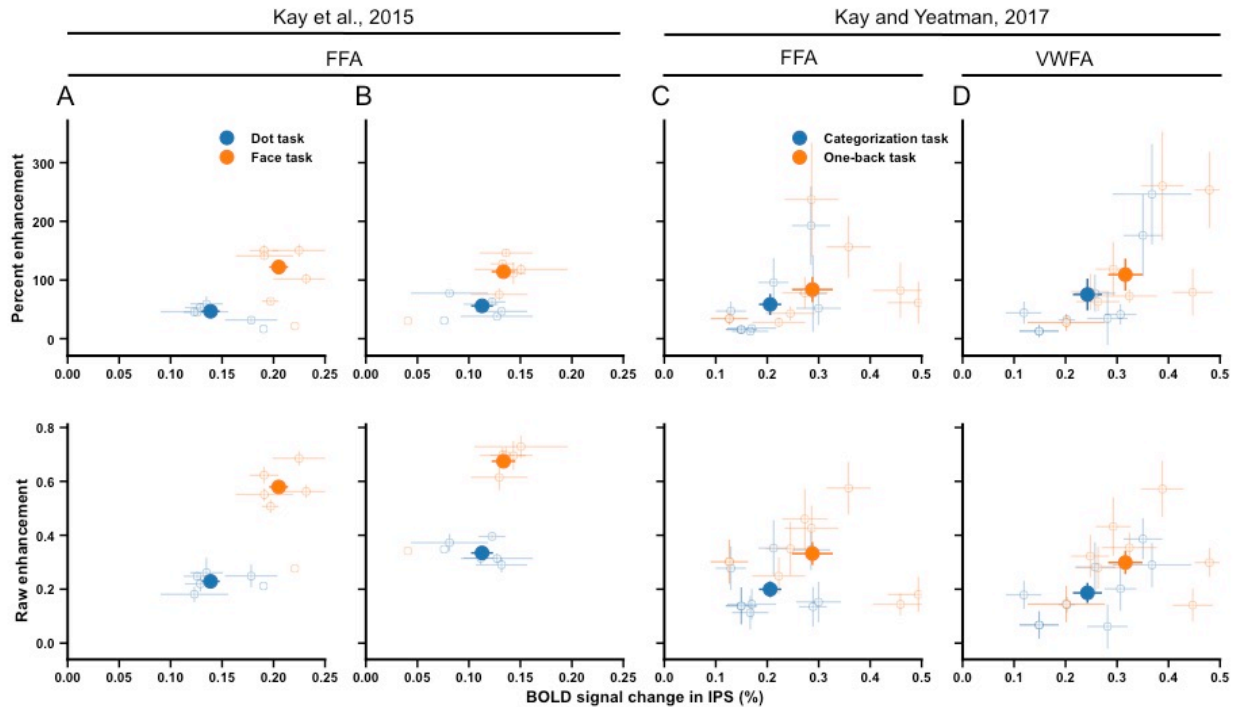

1  
2 Figure 8. Percent enhancement and raw enhancement as a function of IPS activity.  
3 *A-B*. Data from the position study (task experiment and interleaved-task  
4 experiment, respectively). The small open dots indicate different eccentricities,  
5 and the large solid dot indicates the mean across all locations. *C-D*. Data from the  
6 category study. The small open dots indicate individual contrast and phase-  
7 coherence levels, and the large solid dot indicates the overall mean. The results  
8 show that IPS activity is larger for the face task compared to the dot task and for  
9 the one-back task compared to the categorization task, and this is accompanied by  
10 larger attentional enhancements in FFA and VWFA.  
11

## 12 DISCUSSION

13 In this article, we analyzed cortical responses in human VTC as a function of stimulus  
14 eccentricity and task. We found that the degree of attention-induced response enhancement  
15 increases from fovea to periphery and from a face-unrelated task to a face-related task.  
16 Moreover, analyses revealed consistent results in an independent experiment in the same study  
17 and another study involving additional stimulus manipulations and ROIs. Taken together, these  
18 results provide new evidence for constraining theoretical models of attention, and suggest that  
19 the effects of attention are dependent on stimuli and task in ways that are not captured by simple  
20 parametric models of attention that have been previously proposed. Understanding the

1 mechanisms of attention might require further delineating the interaction between attention and  
2 other cognitive processes (e.g., decision-making).

3

#### 4 ***Previous models of attention do not account for the observed effects***

5 Most prior research on the quantitative nature of attention has investigated the impact of  
6 attention on the shape of CRFs ([Li X et al. 2008](#); [Murray SO 2008](#); [Boynton GM 2009](#)). This  
7 approach has prompted several influential computational frameworks, such as the response-gain  
8 model ([McAdams CJ and JH Maunsell 1999](#)), the contrast-gain model ([Reynolds JH et al. 2000](#);  
9 [Martinez-Trujillo JC and S Treue 2004](#)), and the additive-shift model ([Buracas GT and GM  
10 Boynton 2007](#)). One attraction of this fixed-parameter approach is that data from monkey  
11 electrophysiological, human fMRI, and psychophysical studies can be analyzed and compared  
12 within a common mathematical framework. [Boynton GM \(2009\)](#) used CRF modeling to  
13 summarize findings from seven different studies. Among three fMRI studies in his analysis,  
14 results in [Buracas GT and GM Boynton \(2007\)](#) and [Murray SO \(2008\)](#) are better explained by  
15 the additive-shift model, while results in [Li X et al. \(2008\)](#) are better explained by the contrast-  
16 gain model. These models, however, do not provide satisfactory explanations for our data (see  
17 Results).

18 With regard to the contrast-gain model, it is theoretically possible that attention shifts  
19 contrast response functions very far to the left so that only the upper asymptotic part of responses  
20 are observed, and this might be one way of attempting to reconcile the contrast-gain model with  
21 our measurements. However, notice that the contrast-gain model predicts that attention should  
22 produce no response difference at high contrast (i.e., 100%), but we can still see clear response  
23 differences at 100% contrast as well as 100% phase coherence and at the fovea (upper row in  
24 Figure 6).

25 Another limitation of the CRF modeling approach is that it is essentially a descriptive  
26 approach that merely summarizes the apparent structure of data into a function with a few  
27 parameters. The approach does not attempt to characterize the neural source of attentional  
28 modulations, such as where and how top-down influences are generated. In contrast, our efforts  
29 to characterize the IPS as the source of top-down modulations provides an opportunity to study  
30 more directly the causes that underlie modulations of sensory responses.

31

## 1 ***The flexible-attention framework takes into account stimulus and task***

2 Cognitive tasks are remarkably diverse, imposing different task demands on neural  
3 processing. For example, the categorization task in the category study requires attention to the  
4 stimuli and decisions made upon them; the one-back task in the category study requires both  
5 attention and temporal maintenance of information. We propose a flexible-attention framework  
6 that postulates that attention enhances responses in task-relevant regions in order to process  
7 specific stimuli and meet certain task demands. We emphasize that this is a *framework* that  
8 implies a change of conceptual stance, as opposed to a fully quantitative model of attention. In  
9 this framework, the observed top-down modulations in an experiment — which might be  
10 conventionally referred to as “attention” — depend on the details of the other cognitive processes  
11 used to fulfill the task (e.g., decision-making, memory). Conventional fixed-parameter modeling  
12 approaches do not take these complexities into account. For example, even though attention can  
13 be allocated to two different stimuli in seemingly the same way, the task difficulty might differ  
14 for these stimuli and lead to differing neural effects ([Ress D et al. 2000](#); [Kay KN and JD](#)  
15 [Yeatman 2017](#)).

16 Our results have shown the significance of the flexible-attention framework. The inverse  
17 relationship that we have demonstrated between the strength of bottom-up responses and the  
18 magnitude of attentional enhancement has a clear interpretation in the context of evidence-  
19 accumulation models of perceptual decision-making. Most visual tasks require the brain to  
20 accumulate sensory evidence to make a decision, and in general we may suppose that weak  
21 neural responses constitute weak sensory evidence, therefore leading to longer evidence-  
22 accumulation.

23 Note that the flexible-attention framework does not imply that weak neural responses  
24 *always* receive disproportionately large top-down modulation. If a task involves no demand for  
25 processing weak stimuli, the attentional effect on weak stimuli might be small. For an  
26 illustration, consider the fact that attentional effects are relatively small for 0% phase-coherence  
27 stimuli (Figure 6D-F). It may be the case that the absence of any coherent form in these stimuli  
28 may render perceptual decisions (such as category judgment or one-back judgments) easier  
29 compared to the case of partially coherent stimuli. Accordingly, the evidence-accumulation  
30 process may be quite short. To more definitively resolve these unknowns, it is necessary to  
31 develop formal characterizations of the processes that underlie different tasks.

1

## 2 ***IPS as a potential source of top-down attentional enhancement***

3 One might wonder whether the flexible-attention framework can be translated into a quantitative  
4 model that characterizes neural responses. We proposed one such model, called IPS-scaling  
5 model, in the category study ([Kay KN and JD Yeatman 2017](#)). Researchers have long  
6 highlighted the crucial role of the parietal cortex in top-down attentional control; yet quantitative  
7 models have been rarely established. One important stride we made in the category study is to  
8 show that IPS activity predicts the amount of task-induced response scaling observed in FFA and  
9 VWFA.

10 We extend this analysis to the data from the position study. As shown in Figure 8A-B,  
11 IPS responses increase from the dot task to the face task, which mirrors the increase in top-down  
12 modulation in VTC from the dot task to the face task. However, we did not find systematic IPS-  
13 attention covariation across stimulus eccentricities within a task. This is possibly due to the  
14 specific experimental setting here. First, the position study did not set out to study interactions  
15 between IPS and VTC, and the scanning protocol provided only limited coverage of IPS  
16 (approximately up to IPS-0). This may have contributed to the noisy measurements of IPS  
17 responses (large horizontal error bars in Figure 8A-B). Second, the experimental design of the  
18 position study might not have been optimal for eliciting strong responses from the IPS. This is  
19 because the very quick presentation of stimuli (500ms/face) forces participants to quickly make  
20 decisions and this may preclude the complete unfolding of an evidence-accumulation process.

21

## 22 ***Stronger attentional effect in high-level visual areas***

23 In the present study, we primarily focused on high-level category-selective visual regions  
24 instead of low-level or middle-level visual regions, which are the focus of previous studies. One  
25 benefit of choosing FFA and VWFA is that we have relatively advanced understandings of their  
26 functional selectivities ([Grill-Spector K et al. 2017](#)). Moreover, these high-level visual areas are  
27 known for receiving greater attentional impacts compared to low-level visual areas ([Kastner S  
28 and LG Ungerleider 2000](#)). Indeed, we found much stronger attentional effects in high-level  
29 face-selective areas than low-level areas (Figures 3-4). This provides the advantage of a larger  
30 dynamic range of attentional enhancement, which helps to adjudicate different models of  
31 attention.

1 Another departure from previous studies is that we not only target high-level visual areas,  
2 but also measure their responses to a wide range of stimulus and task manipulations. For  
3 instance, previous studies using the CRF modeling approach typically manipulate only stimulus  
4 contrast. How attention influences visual coding on a broader range of feature dimensions (e.g.,  
5 eccentricity, phase coherence) remains under-studied. In the position and category studies, we  
6 probed attentional effects as a function of three stimulus features (eccentricity, contrast, phase  
7 coherence), providing a more complete characterization of functional properties of the visual  
8 system. One recent study found that attentional effects were larger in fovea than in periphery  
9 ([Bressler DW et al. 2013](#)). That study, however, used checkerboard stimuli that elicited only  
10 strong responses in low-level visual areas. One important direction of future work might be to  
11 explain such differential attentional effect between low-level and high-level cortices.

12

### 13 *Region-level characterization of attentional effects*

14 The original analyses performed in the position study ([Kay KN et al. 2015](#)) examined  
15 attentional effects on spatial representation in human VTC at the level of single voxels. Through  
16 population receptive field (pRF) modeling, it was shown that task-specific attention alters the  
17 center, size and amplitude of pRFs of voxels in VTC. Analyses in the current paper pursue a  
18 fundamentally different approach and provide different insight into the nature of attentional  
19 modulation. Rather than characterizing the spatial tuning profile of individual voxels, we  
20 calculated region-level responses and investigated how and why the strength of attentional  
21 modulations varies for different stimuli and tasks. Though the motivations are different, the two  
22 approaches have revealed some conceptually consistent results. For instance, both analyses  
23 demonstrate greater attentional effects in the face task compared to the dot task, and attentional  
24 effects are found to progressively develop along the visual hierarchy. We believe that exploring  
25 different analyses and interpretations of neural measurements is critical for achieving a better  
26 understanding of attentional effects.

27

### 28 **AUTHOR CONTRIBUTIONS**

29 R.Z. analyzed the data. R.Z. and K.K. wrote the paper.

30

1 **ACKNOWLEDGEMENTS**

2 We thank S. Engel for comments on the manuscript. This work was supported by NIH Grants  
3 P41 EB015894 and P30 NS076408.

4

5

6

## 1 REFERENCES

- 2 Albrecht DG, Hamilton DB. 1982. Striate cortex of monkey and cat: contrast response function.  
3 *J Neurophysiol* 48:217-237.
- 4 Boynton GM. 2009. A framework for describing the effects of attention on visual responses.  
5 *Vision Res* 49:1129-1143.
- 6 Bressler DW, Fortenbaugh FC, Robertson LC, Silver MA. 2013. Visual spatial attention  
7 enhances the amplitude of positive and negative fMRI responses to visual stimulation in an  
8 eccentricity-dependent manner. *Vision Res* 85:104-112.
- 9 Buracas GT, Boynton GM. 2007. The effect of spatial attention on contrast response functions in  
10 human visual cortex. *J Neurosci* 27:93-97.
- 11 Gandhi SP, Heeger DJ, Boynton GM. 1999. Spatial attention affects brain activity in human  
12 primary visual cortex. *Proc Natl Acad Sci U S A* 96:3314-3319.
- 13 Grill-Spector K, Weiner KS, Kay K, Gomez J. 2017. The Functional Neuroanatomy of Human  
14 Face Perception. *Annu Rev Vis Sci* 3:167-196.
- 15 Itti L, Koch C, Niebur E. 1998. A model of saliency-based visual attention for rapid scene  
16 analysis. *Ieee Transactions on Pattern Analysis and Machine Intelligence* 20:1254-1259.
- 17 Kastner S, Ungerleider LG. 2000. Mechanisms of visual attention in the human cortex. *Annu*  
18 *Rev Neurosci* 23:315-341.
- 19 Kay KN, Rokem A, Winawer J, Dougherty RF, Wandell BA. 2013. GLMdenoise: a fast,  
20 automated technique for denoising task-based fMRI data. *Front Neurosci* 7:247.
- 21 Kay KN, Weiner KS, Grill-Spector K. 2015. Attention reduces spatial uncertainty in human  
22 ventral temporal cortex. *Curr Biol* 25:595-600.
- 23 Kay KN, Yeatman JD. 2017. Bottom-up and top-down computations in word- and face-selective  
24 cortex. *Elife* 6.
- 25 Li X, Lu ZL, Tjan BS, Doshier BA, Chu W. 2008. Blood oxygenation level-dependent contrast  
26 response functions identify mechanisms of covert attention in early visual areas. *Proc Natl Acad*  
27 *Sci U S A* 105:6202-6207.
- 28 Luck SJ, Chelazzi L, Hillyard SA, Desimone R. 1997. Neural mechanisms of spatial selective  
29 attention in areas V1, V2, and V4 of macaque visual cortex. *J Neurophysiol* 77:24-42.
- 30 Martinez-Trujillo JC, Treue S. 2004. Feature-based attention increases the selectivity of  
31 population responses in primate visual cortex. *Curr Biol* 14:744-751.
- 32 McAdams CJ, Maunsell JH. 1999. Effects of attention on orientation-tuning functions of single  
33 neurons in macaque cortical area V4. *J Neurosci* 19:431-441.

- 1 Murray SO. 2008. The effects of spatial attention in early human visual cortex are stimulus  
2 independent. *J Vis* 8:2 1-11.
- 3 Murray SO, Wojciulik E. 2004. Attention increases neural selectivity in the human lateral  
4 occipital complex. *Nat Neurosci* 7:70-74.
- 5 Ress D, Backus BT, Heeger DJ. 2000. Activity in primary visual cortex predicts performance in  
6 a visual detection task. *Nat Neurosci* 3:940-945.
- 7 Reynolds JH, Chelazzi L. 2004. Attentional modulation of visual processing. *Annu Rev Neurosci*  
8 27:611-647.
- 9 Reynolds JH, Pasternak T, Desimone R. 2000. Attention increases sensitivity of V4 neurons.  
10 *Neuron* 26:703-714.
- 11 Treisman AM, Gelade G. 1980. A feature-integration theory of attention. *Cogn Psychol* 12:97-  
12 136.
- 13 Walther D, Itti L, Riesenhuber M, Poggio T, Koch C. 2002. Attentional selection for object  
14 recognition - A gentle way. *Biologically Motivated Computer Vision, Proceedings* 2525:472-  
15 479.
- 16 Wang L, Mruczek RE, Arcaro MJ, Kastner S. 2015. Probabilistic Maps of Visual Topography in  
17 Human Cortex. *Cereb Cortex* 25:3911-3931.  
18
